# Supplementary material for: Kinome Analysis of Receptor-Induced Phosphorylation in Human Natural Killer Cells
Source: PLOS journal article supplement (doi:10.1371/journal.pone.0029672), 2012-01-04
Supplement: S7 (10.1371/journal.pone.0029672.s007) [file journal.pone.0029672.s007]

Table S1 - Performed phosphokinome experiments

| Experiment    | Kinases | Phosphorylated kinases | Phosphorylation sites |
|---------------|---------|------------------------|-----------------------|
| I (Donor 1)   | 144     | 92                     | 214                   |
| II (Donor 2)  | 149     | 94                     | 166                   |
| III (Donor 1) | 153     | 89                     | 202                   |
| Total         | 188     | 95                     | 313 <sup>§</sup>      |

In experiment I and II cIgG-, CD16- and 2B4/DNAM-1-activated NK cells were analyzed. In experiment III cIgG- and 2B4/DNAM-1-activated NK cells were analyzed. <sup>§</sup>Mascot-based annotation of serine and threonine phosphorylation was checked by the AScore algorithm. 47 phosphorylation sites could not be assigned unambiguously.
